# Supplementary material for: Persistent mTORC1 activation underlies sex dimorphic progression of MASLD in mice with hepatocyte prohibitin-1 deficiency
Source: Research Square preprint supplement (doi:10.21203/rs.3.rs-7481614/v1), 2025-09-25
Supplement: Supplementary file 1 [file 14c6b3f9be78c819dea7d4e0.docx]

Briefly, the frozen liver tissues were first lyophilized and then transferred into tubes containing ceramic beads for homogenization. Each sample was treated with an extraction solution (18:1 w/v) that included nine isotopically labeled internal standards. The samples were thoroughly homogenized, followed by incubation on a rotator at –20 °C for one hour. After incubation, samples were centrifuged at 21,000 × g for 10 minutes to separate particulates. The resulting supernatants were transferred into fresh 1.5 mL microcentrifuge tubes and vortexed. A 300 µL aliquot of each supernatant was placed into a new microcentrifuge tube and subjected to solvent evaporation using a speed vacuum concentrator. The resulting dried residues were then reconstituted in 30 µL of a 1:1 mixture of acetonitrile and water. These reconstituted samples were vortexed, stored at –20 °C overnight, and subsequently centrifuged to remove any particulates. The clarified supernatants were then transferred into LC-MS autosampler vials for analysis. LC-MS was performed using on a Thermo Q Exactive hybrid quadrupole Orbitrap mass spectrometer with a Vanquish Flex UHPLC system or Vanquish Horizon UHPLC system. Separation was achieved using a Millipore SeQuant ZIC-pHILIC column (2.1 × 150 mm, 5 μm particle size), in tandem with a ZIC-pHILIC guard column (20 × 2.1 mm). Data processing was performed using Thermo Scientific TraceFinder 4.1 software. Metabolite identification was accomplished by referencing an internal library of standards validated by the University of Iowa Metabolomics Core Facility. Signal drift correction was performed using NOREVA (PMID: 28525573), and metabolite abundance was normalized to the total ion count for each sample.
